# Supplementary material for: Development of a multiplex PCR for detection of pathogenic Mycobacterium orygis in cattle tissues harboring tuberculous-like lesions
Source: Research Square preprint supplement (doi:10.21203/rs.3.rs-6947470/v1), 2025-09-04

**Development of a multiplex PCR for detection of pathogenic *Mycobacterium orygis* in cattle tissues harboring tuberculous-like lesions**

Sukhen Samanta1, Premanshu Dandapat2, Molla Zakirul Haque3, Partha Sarathi Jana3, Samiran Bandyopadhyay4, Arnab Sen4, Pramod Kumar Nanda4, Subhasree Das3, Keka Sarkar1,*, Prasad Thomas2, Abhishek2, Ayan Mukherjee3,*, Sachinandan De5,*

**Corresponding authors’ email**:

[keka@klyuniv.ac.in](mailto:keka@klyuniv.ac.in) (ORCID ID: 0000-0002-0700-2207)

[dramukherjee@wbuafscl.ac.in](mailto:dramukherjee@wbuafscl.ac.in) (ORCID id: 0000-0002-5364-2141),

[sachinandan@gmail.com](mailto:sachinandan@gmail.com) (ORCID id: 0000-0002-3182-0904)

**Fig. 1: Nucleotide BLAST analysis of fadD23 amplicon shows the presence of single copy gene in *M. orygis* genome**

>*fadD23 amplicon*

ACGGCATTCACTTACATCGATTACGAACGGGATTCGGAGGGCATAAGTGAAAGCCTGACGTGGTCGCAGGTGTATCGGCGAACCCTAAAC

GTTGCAGCAGAAGTCCGCCGCCATGCCGCAATTGGTGACCGTGCAGTGATATTGGCCCCACAAGGACGCGATTATATTGTTGCTTTTCTG

G

**Nucleotide BLAST result**


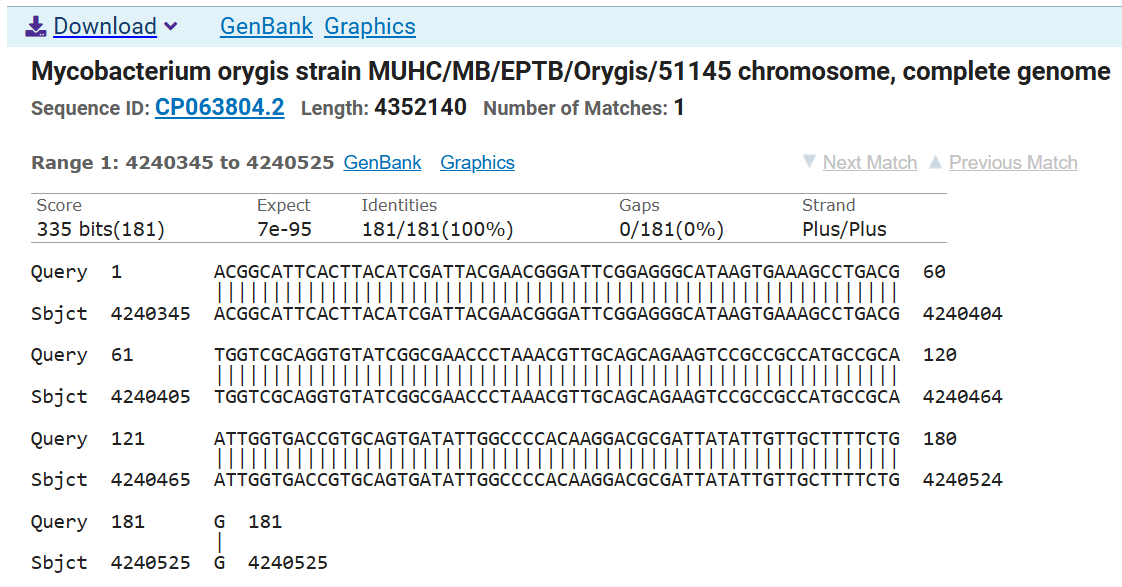


**Fig. 2: Nucleotide BLAST analysis of *mbtG* amplicon shows the presence of single copy gene in *M. orygis* genome**

*>mbtG amplicon*

CTGTTCAGTCAGCACACCCTCGACCTGCTCGAGCTGGGACTGGGTGGACCGCTGACCGCCGACCGCCTGCAGGAAGCGATCGGCTACGAC

TTGGCAGTCACCGACGTCACGCCCAAGCTGTTCCTGCCCACCCTGTCCGGACTCACCCAGGGGCCCGGGTTCCCCAACCTGAGCTGCCTC

GGCTTGTTGTCGGACCGGGTGCTCGGCGCCGGCATCTATACGCCGACCAAACACAACGAC

**Nucleotide BLAST result**


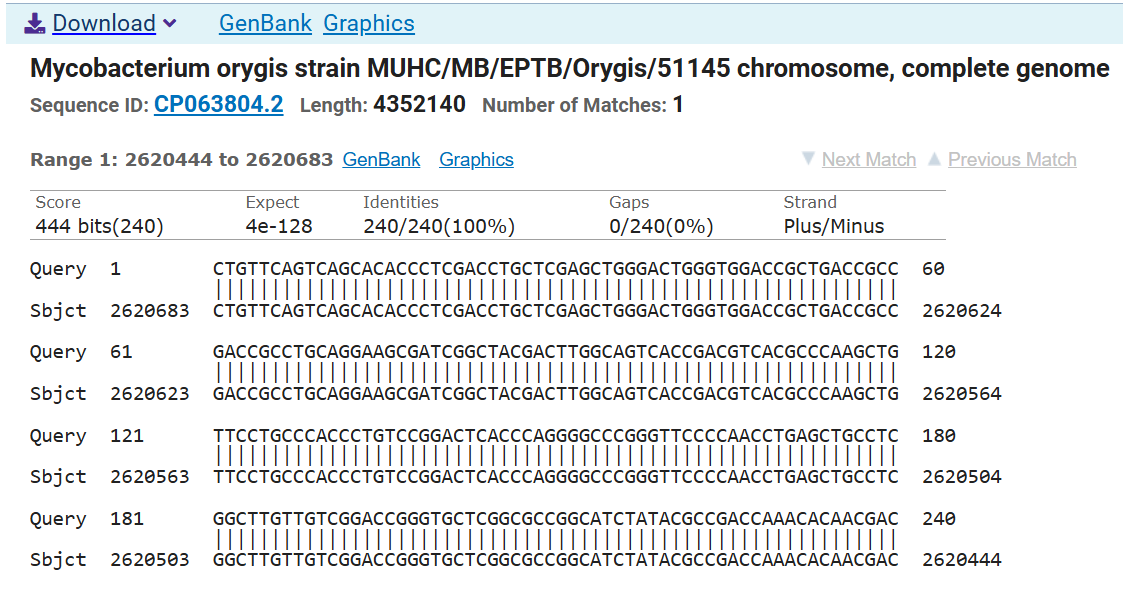


**Fig. 3: Nucleotide BLAST analysis of IS1081amplicon shows the presence of multiple copies in *M. orygis* genome**

>*IS1081 amplicon*

AAGGAAATGACGCAATGACCTCTTCTCATCTTATCGACACCGAGCAGCTTCTGGCTGACCAACTCGCACAGGCGAGCCCGGATCTGCTGC

GCGGGCTGCTCTCGACGTTCATCGCCGCCTTGATGGGGGCTGAAGCCGACGCCCTGTGCGGGGCGGGCTACCGCGAACGCAGCGATGAGC

GGTCCAATCAGCGCAACGGCTACCGCCACCGTGATTTCGACACCCGTGCCGCAACCATCGACGTCGCGATCCCCAAGCTGCGCCAGGGCA

GCTATTTCCCGGACTGGCTGCTGCAGCGCCGCAAGCGAGCTGAACGCGCACTGACCAGCGTGGTGGCGACCTGCTACCTGCTGGGAGTAT

CCACTCGCCGGATGGAGCGCCTGGTCGAAACACTTGGTGTGACAAAGCTTTCCAAGTCGCAAGTGTCGATCATG

**Nucleotide BLAST result**


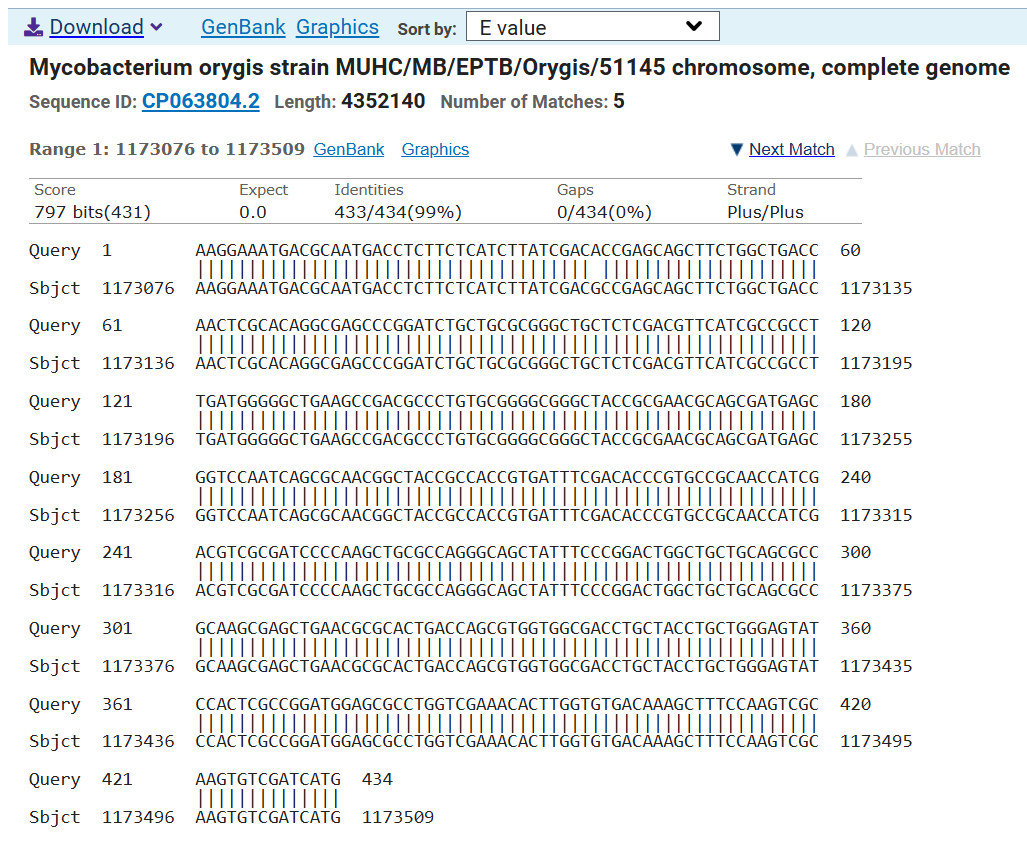

Supplement: Supplementary file 1 [file 936f007337fdbe1c655e59f9.docx]
