# Supplementary material for: Development of a multiplex PCR for detection of pathogenic Mycobacterium orygis in cattle tissues harboring tuberculous-like lesions
Source: Research Square preprint supplement (doi:10.21203/rs.3.rs-6947470/v1), 2025-09-04
Supplement: Supplementary file 2 [file cb158a2568d532c2ad94fbd9.docx]

**Development of a multiplex PCR for detection of pathogenic *Mycobacterium orygis* in cattle tissues harboring tuberculous-like lesions**

Sukhen Samanta1, Premanshu Dandapat2, Molla Zakirul Haque3, Partha Sarathi Jana3, Samiran Bandyopadhyay4, Arnab Sen4, Pramod Kumar Nanda4, Subhasree Das3, Keka Sarkar1,*, Prasad Thomas2, Abhishek2, Ayan Mukherjee3,*, Sachinandan De5,*

**Corresponding authors’ email**:

[keka@klyuniv.ac.in](mailto:keka@klyuniv.ac.in) (ORCID ID: 0000-0002-0700-2207)

[dramukherjee@wbuafscl.ac.in](mailto:dramukherjee@wbuafscl.ac.in) (ORCID id: 0000-0002-5364-2141),

[sachinandan@gmail.com](mailto:sachinandan@gmail.com) (ORCID id: 0000-0002-3182-0904)

**
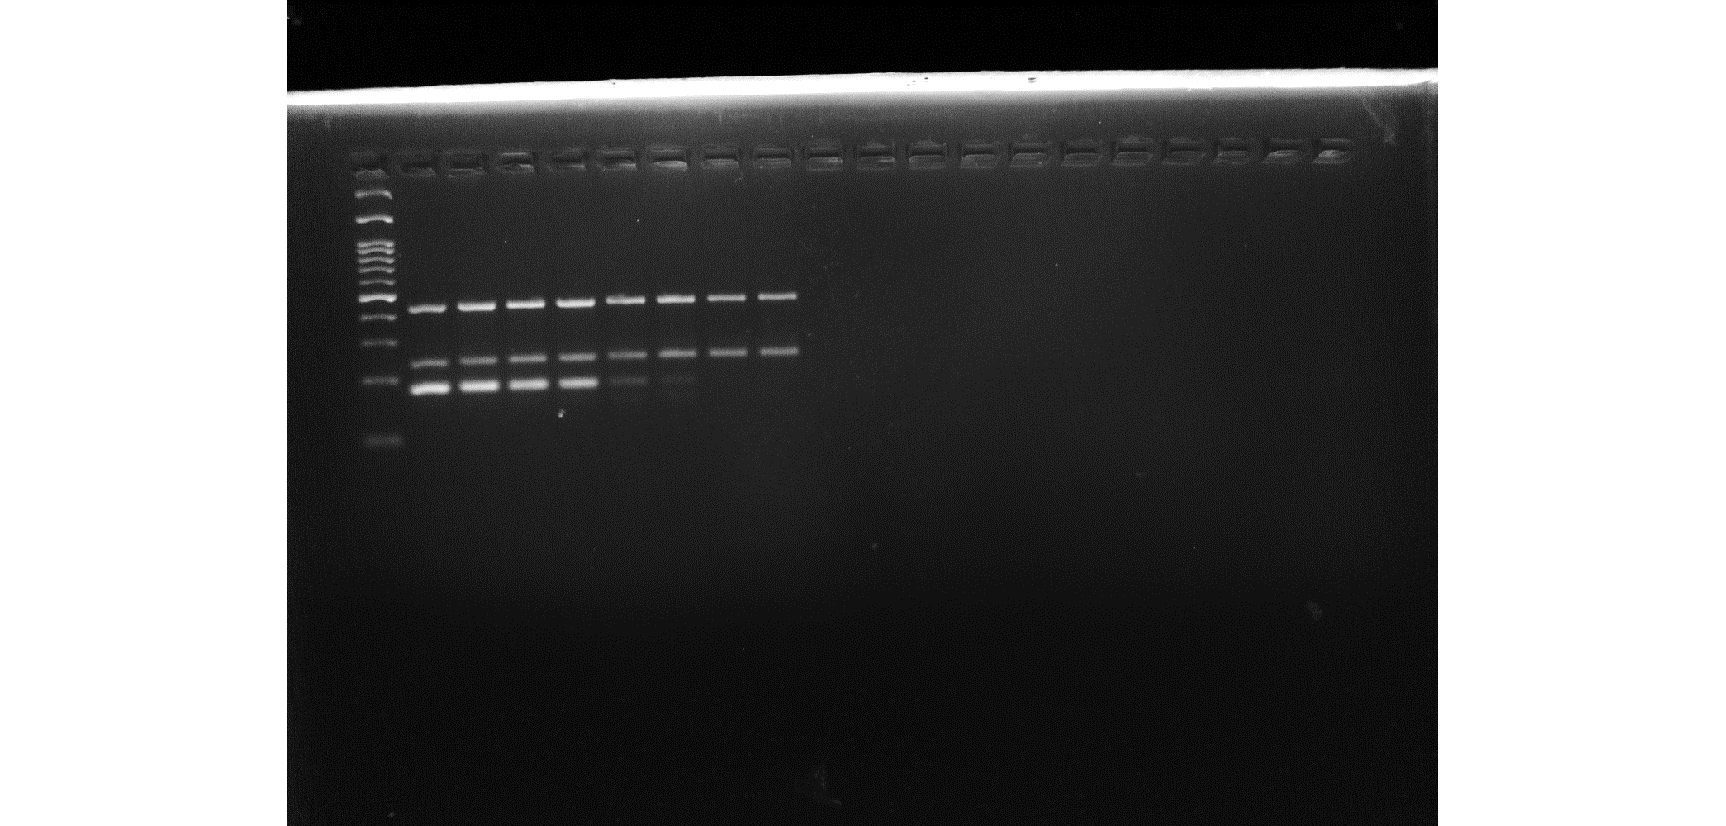
**

**Fig.1 Uncropped gel photograph of Fig. 4**


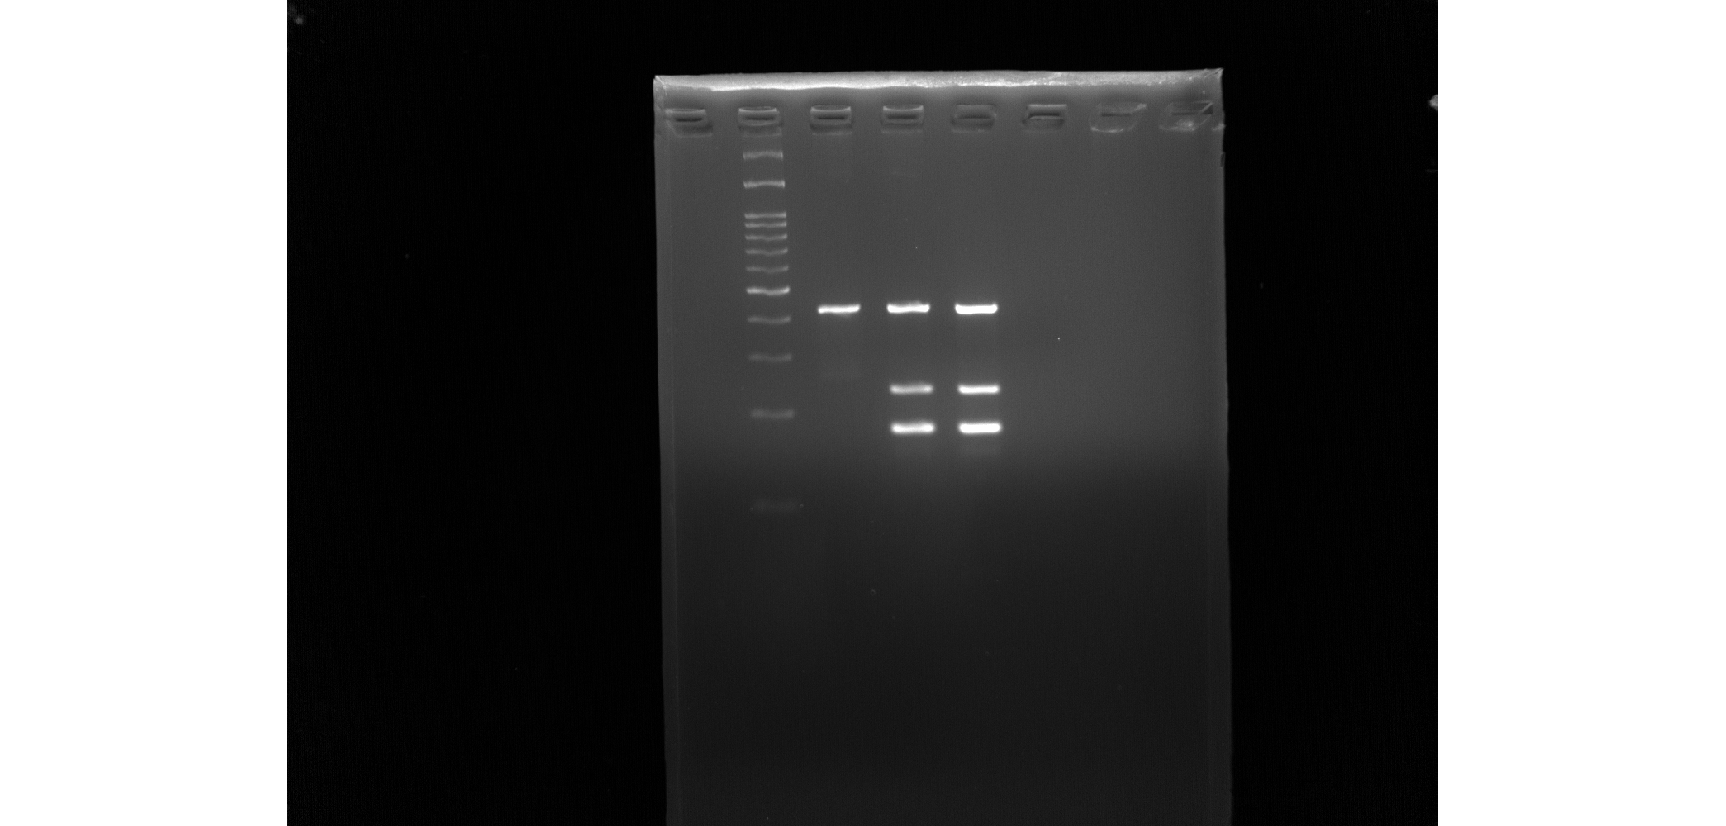


**Fig.2 Uncropped gel photograph of Fig. 5**


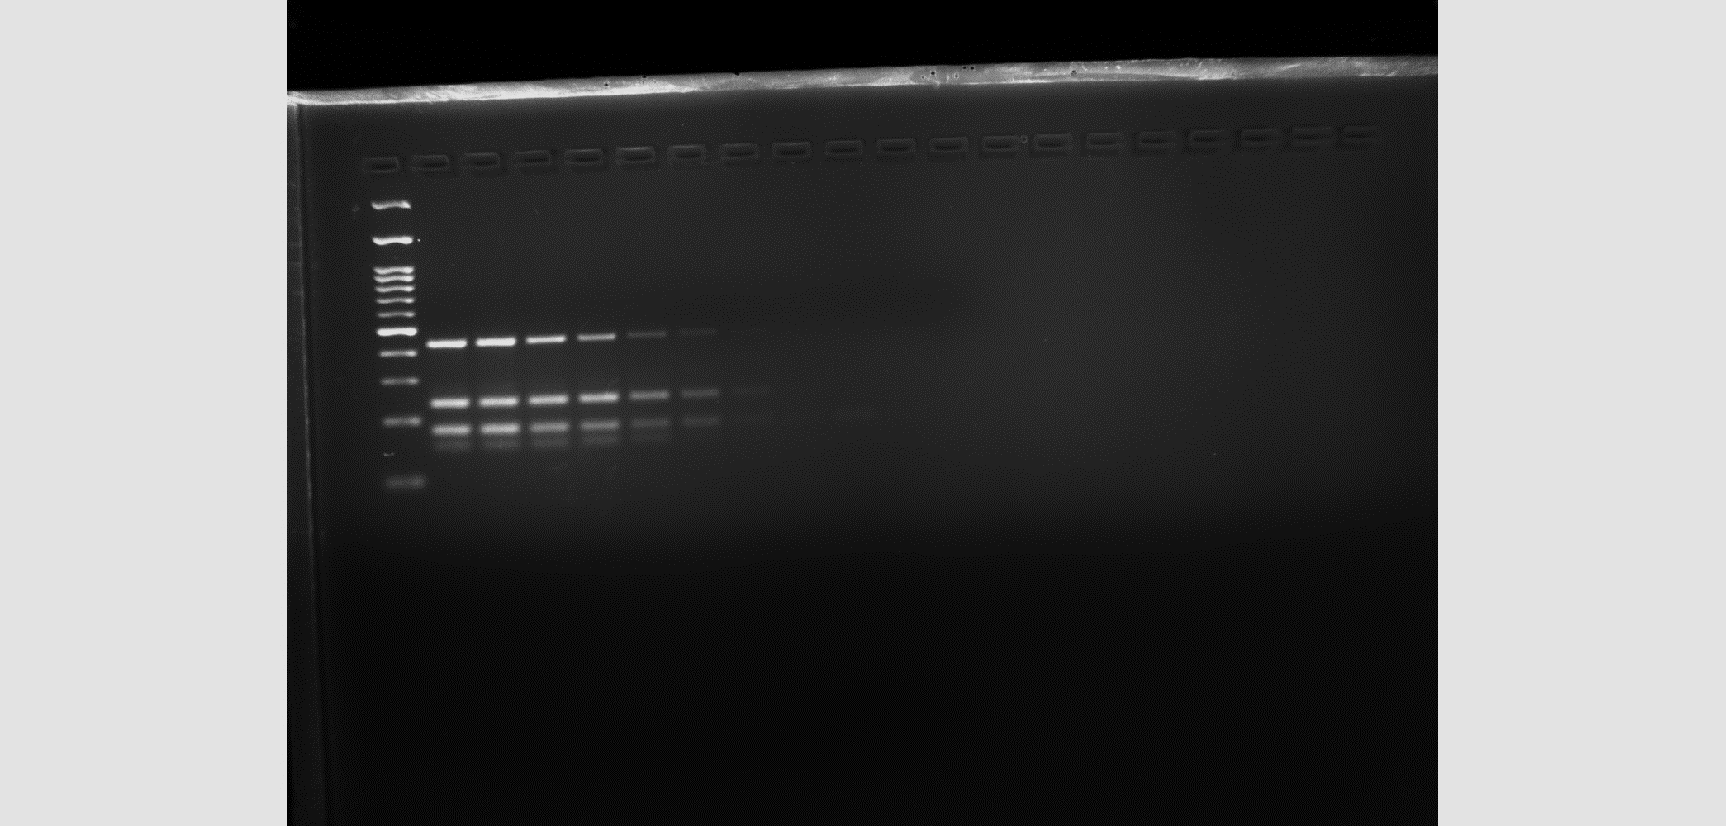


**Fig.3 Uncropped gel photograph of Fig. 6**

**
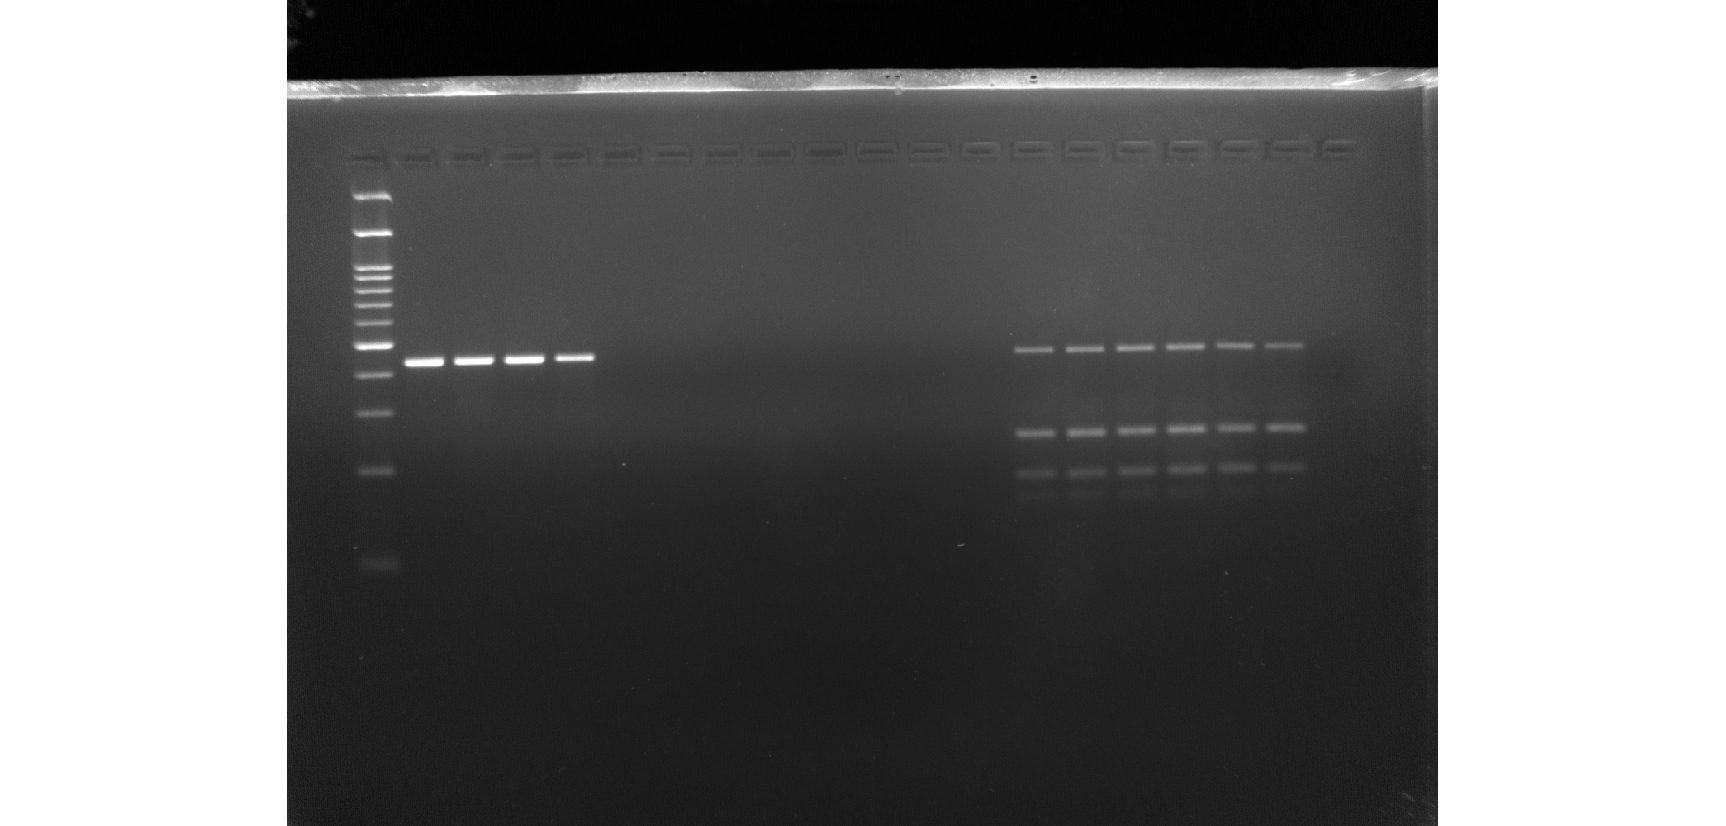
**

**Fig.4 Uncropped gel photograph of Fig. 7**


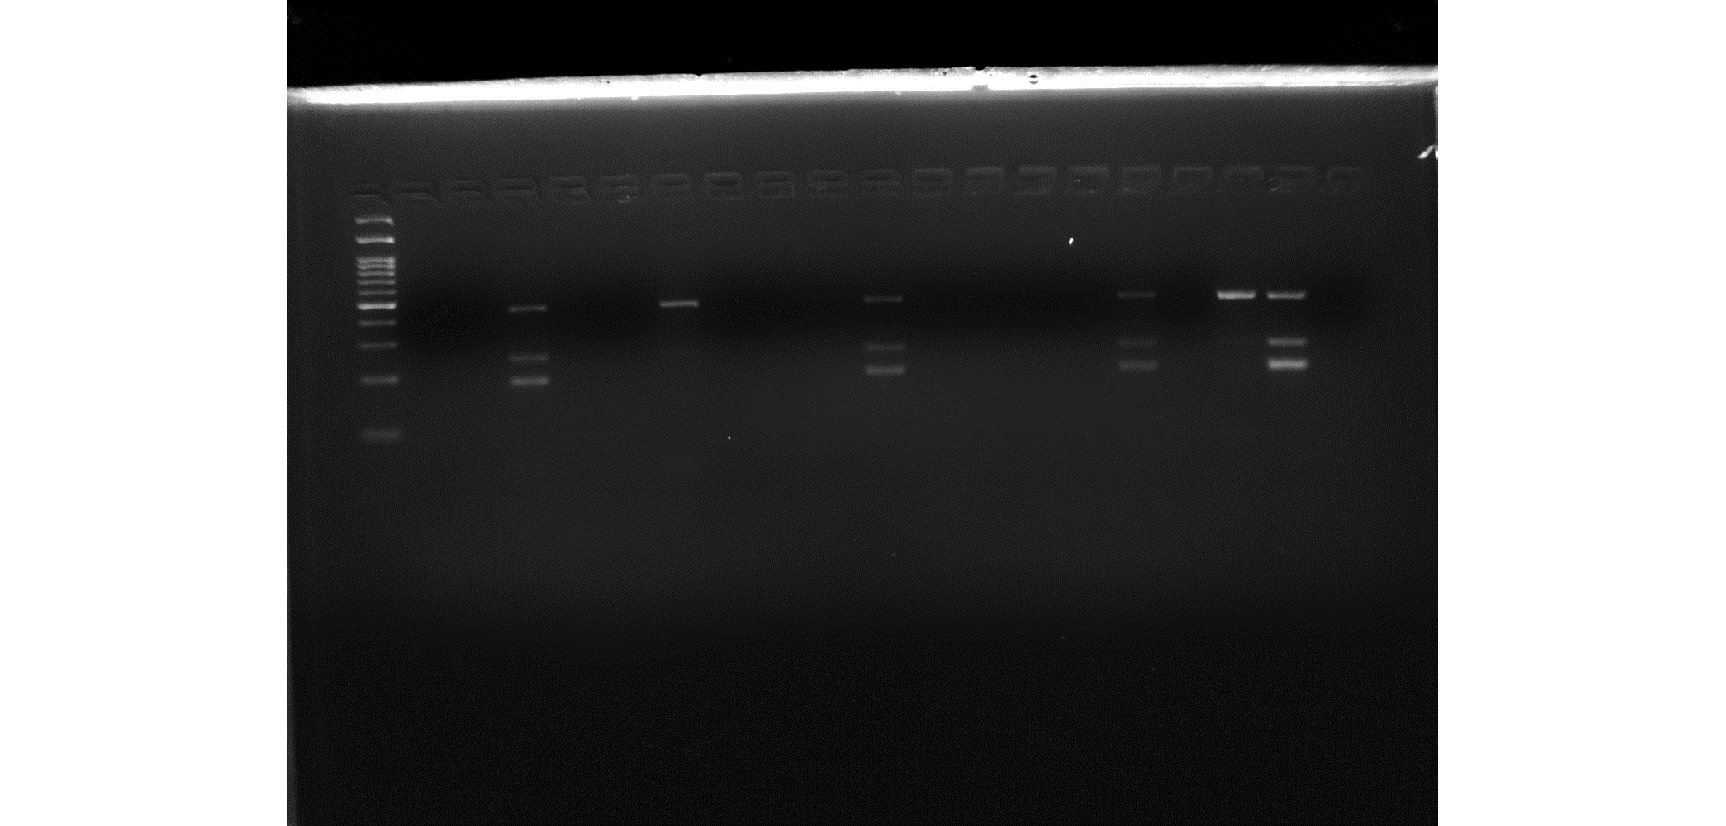


**Fig.5 Uncropped gel photograph of Fig. 8**
